# Supplementary material
Source: MDPI journal article supplement (https://www.mdpi.com/2073-4441/15/7/1257)
Supplement: s1 [file s1]

Supplementary Table S1. Detailed experimental condition.

| Type of Water                         | Wavelength (nm) | Light Intensity ( $\mu\text{W}/\text{cm}^2$ ) | Irradiation Time (s) | UV Dosage ( $\text{mJ}/\text{cm}^2$ ) | Study Parameter                   |
|---------------------------------------|-----------------|-----------------------------------------------|----------------------|---------------------------------------|-----------------------------------|
| Secondary effluent (after incubation) | 280             | 964                                           | 0                    | 0                                     | <i>E. coli</i> and Total coliform |
|                                       |                 |                                               | 4                    | 4                                     |                                   |
|                                       |                 |                                               | 10                   | 10                                    |                                   |
|                                       |                 |                                               | 20                   | 19                                    |                                   |
|                                       |                 |                                               | 0                    | 0                                     |                                   |
|                                       | 280             | 385.6                                         | 10                   | 4                                     |                                   |
|                                       |                 |                                               | 25                   | 10                                    |                                   |
|                                       |                 |                                               | 50                   | 19                                    |                                   |
|                                       |                 |                                               | 0                    | 0                                     |                                   |
|                                       |                 |                                               | 20                   | 4                                     |                                   |
|                                       | 280             | 192.8                                         | 50                   | 10                                    |                                   |
|                                       |                 |                                               | 100                  | 19                                    |                                   |
|                                       |                 |                                               | 0                    | 0                                     |                                   |
|                                       |                 |                                               | 40                   | 4                                     |                                   |
|                                       |                 |                                               | 100                  | 10                                    |                                   |
|                                       | 280             | 96.4                                          | 200                  | 19                                    |                                   |
|                                       |                 |                                               | 0                    | 0                                     |                                   |
|                                       |                 |                                               | 60                   | 576                                   |                                   |
|                                       |                 |                                               | 120                  | 1152                                  |                                   |
|                                       |                 |                                               | 240                  | 2304                                  |                                   |
| Secondary effluent                    | 280             | 9640                                          | 0                    | 0                                     |                                   |
|                                       |                 |                                               | 120                  | 576                                   |                                   |
|                                       |                 |                                               | 240                  | 1152                                  |                                   |
|                                       |                 |                                               | 480                  | 2304                                  |                                   |
|                                       |                 |                                               | 0                    | 0                                     |                                   |
|                                       | 280             | 4820                                          | 300                  | 576                                   | cATP                              |
|                                       |                 |                                               | 600                  | 1152                                  |                                   |
|                                       |                 |                                               | 1200                 | 2304                                  |                                   |
|                                       |                 |                                               | 0                    | 0                                     |                                   |
|                                       |                 |                                               | 300                  | 34                                    |                                   |
| Secondary effluent (after incubation) | 405             | 112,000                                       | 600                  | 67                                    |                                   |
|                                       |                 |                                               | 1200                 | 134                                   |                                   |
|                                       |                 |                                               | 1800                 | 202                                   |                                   |
|                                       |                 |                                               | 0                    | 0                                     |                                   |
|                                       |                 |                                               | 1800                 | 202                                   |                                   |
| Secondary effluent                    | 405             | 112,000                                       | 3600                 | 403                                   | cATP                              |
|                                       |                 |                                               | 5400                 | 605                                   |                                   |
|                                       |                 |                                               | 0                    | 0                                     |                                   |
| Primary influent                      | 280             | 96.4                                          | 0                    | 0                                     |                                   |

|          |     |      |      |       |                                                         |
|----------|-----|------|------|-------|---------------------------------------------------------|
|          |     |      | 25   | 2     |                                                         |
|          |     |      | 50   | 5     |                                                         |
|          |     |      | 200  | 19    |                                                         |
|          |     |      | 400  | 39    |                                                         |
|          |     |      | 0    | 0     |                                                         |
|          |     |      | 10   | 10    |                                                         |
|          | 280 | 964  | 40   | 39    | <i>E. coli</i> , Total<br>coliform and<br>SARS-Cov-2 N1 |
|          |     |      | 100  | 96    |                                                         |
|          |     |      | 200  | 193   |                                                         |
|          |     |      | 0    | 0     |                                                         |
|          |     |      | 10   | 96    |                                                         |
|          | 280 | 9640 | 20   | 193   |                                                         |
|          |     |      | 40   | 386   |                                                         |
|          |     |      | 60   | 578   |                                                         |
|          |     |      | 0    | 0     |                                                         |
|          |     |      | 120  | 1157  |                                                         |
|          |     |      | 300  | 2892  |                                                         |
| DI water | 280 | 9640 | 600  | 5784  | BSA                                                     |
|          |     |      | 1800 | 17352 |                                                         |
|          |     |      | 3600 | 34704 |                                                         |
|          |     |      | 5400 | 52056 |                                                         |
|          |     |      | 0    | 0     |                                                         |
| DI water | 280 | 9640 | 5400 | 52056 | SARS-CoV-2<br>Spike protein                             |

---
